# Supplementary material
Source: PubMed Central journal article supplement (PMC6723904)
Supplement: nutrients-11-01738-s001.pdf [file nutrients-11-01738-s001.pdf]

## Supplementary Materials

**Supplementary Table S1.** Mean intake of various food groups (g/day) (by age and sex) and their comparison between year 1997 and 2009, in the study population (n=3581), aged  $\geq 20$  years, Lebanon

|                                           | Males<br>(n=1572) |                  |                  | Females<br>(n=2009) |                  |                  | Both sexes<br>(n=3581) |                  |                  |
|-------------------------------------------|-------------------|------------------|------------------|---------------------|------------------|------------------|------------------------|------------------|------------------|
|                                           | 1997<br>(n=436)   | 2009<br>(n=1136) | p-<br>value      | 1997<br>(n=627)     | 2009<br>(n=1382) | p-<br>value      | 1997<br>(n=1063)       | 2009<br>(n=2518) | p-<br>value      |
| <b>20-39.9 years</b>                      |                   |                  |                  |                     |                  |                  |                        |                  |                  |
| Bread                                     | 184.53±15.85      | 147.83±8.53      | <b>0.043</b>     | 89.33±5.79          | 74.9±3.77        | <b>0.038</b>     | 128.85±7               | 104.4±4.23       | <b>0.003</b>     |
| Cereals and cereal based products         | 109.93±17.04      | 168.27±9.18      | <b>0.003</b>     | 103.08±8.96         | 99.22±5.83       | 0.720            | 106.68±8.55            | 128.92±5.17      | <b>0.027</b>     |
| Legumes                                   | 39.28±11.9        | 58.51±6.41       | 0.158            | 17.94±11.22         | 34.67±7.3        | 0.214            | 28.12±8.28             | 44.06±5          | 0.101            |
| Starchy Vegetables                        | 47.68±8.49        | 49.34±4.57       | 0.865            | 33.72±3.77          | 35.49±2.45       | 0.696            | 39.69±3.96             | 41.13±2.39       | 0.758            |
| Vegetables                                | 200.75±18.21      | 189.59±9.81      | 0.592            | 190.35±11.78        | 169.67±7.66      | 0.144            | 195.9±10.03            | 177.65±6.06      | 0.122            |
| Chips & Salty Crackers                    | 0.99±1.25         | 4.86±0.67        | <b>0.007</b>     | 1.67±0.74           | 4.37±0.48        | <b>0.002</b>     | 1.62±0.66              | 4.52±0.39        | <b>&lt;0.001</b> |
| Nuts & Seeds                              | 21.73±3.91        | 10.28±2.11       | <b>0.011</b>     | 7.83±2.05           | 10.45±1.34       | 0.290            | 13±1.95                | 10.25±1.18       | 0.232            |
| Dairy Products                            |                   |                  |                  |                     |                  |                  |                        |                  |                  |
| Milk                                      | 28.8±5.03         | 15.49±2.71       | <b>0.021</b>     | 40.94±3.77          | 11.57±2.45       | <b>&lt;0.001</b> | 36.76±3.01             | 13.27±1.82       | <b>&lt;0.001</b> |
| Milk Derivatives                          | 80.63±11          | 82.57±5.92       | 0.877            | 60.06±5.78          | 63.22±3.76       | 0.650            | 69.46±5.48             | 70.85±3.32       | 0.829            |
| Milk Sweetened                            | 0.1±2.52          | 4.66±1.35        | 0.099            | 2.06±1.41           | 3.19±0.91        | 0.503            | 1.36±1.29              | 3.81±0.78        | 0.107            |
| Meat, Processed Meat, Poultry, Fish, Eggs |                   |                  |                  |                     |                  |                  |                        |                  |                  |
| Red Meat                                  | 78.34±9.03        | 58.25±4.86       | 0.052            | 41.6±3.87           | 27.64±2.52       | <b>0.003</b>     | 56.54±4.18             | 40.22±2.53       | <b>0.001</b>     |
| Processed Meat                            | 9.95±2.31         | 8.01±1.24        | 0.463            | 5.52±1.3            | 4.23±0.84        | 0.410            | 7.24±1.19              | 5.82±0.72        | 0.309            |
| Poultry                                   | 42.36±9.91        | 51.52±5.34       | 0.419            | 22.15±3.73          | 25.99±2.42       | 0.392            | 30.13±4.4              | 36.79±2.66       | 0.199            |
| Fish                                      | 9.01±6.08         | 22.28±3.27       | 0.057            | 6.97±2.33           | 9.14±1.51        | 0.439            | 8.32±2.71              | 14.64±1.64       | <b>0.048</b>     |
| Eggs                                      | 15.32±2.96        | 9.83±1.59        | 0.106            | 9.29±1.23           | 5.59±0.8         | <b>0.013</b>     | 11.88±1.35             | 7.26±0.82        | 0.004            |
| Fruits, Total                             |                   |                  |                  |                     |                  |                  |                        |                  |                  |
| Fruits                                    | 210.46±18.24      | 85.17±9.82       | <b>&lt;0.001</b> | 185.31±11.71        | 92.38±7.62       | <b>&lt;0.001</b> | 194.33±10              | 89.13±6.04       | <b>&lt;0.001</b> |
| Fresh Juices (100% fruit juices)          | 21.59±6.16        | 9.3±3.32         | 0.081            | 30.13±5.4           | 8.15±3.51        | <b>0.001</b>     | 26.72±4.07             | 8.82±2.46        | <b>&lt;0.001</b> |
| Sweets & Added Sugars                     |                   |                  |                  |                     |                  |                  |                        |                  |                  |
| Sweets                                    | 49.49±6.19        | 41.14±3.33       | 0.239            | 47.52±4.44          | 41.11±2.89       | 0.229            | 49.04±3.61             | 40.81±2.18       | 0.053            |
| Added Sugars, Jams, Honey, Molasses       | 8.26±1.26         | 8.23±0.67        | 0.982            | 7±0.86              | 6.73±0.56        | 0.800            | 7.67±0.71              | 7.3±0.43         | 0.658            |
| Sugar Sweetened Beverages                 | 311.22±29.23      | 255.06±15.74     | 0.093            | 154.09±12.9         | 127.46±8.39      | 0.086            | 218.17±13.61           | 179.73±8.23      | <b>0.016</b>     |
| Hot Beverages (Coffee, Tea)               | 182.84±20.46      | 172.23±11.02     | 0.650            | 135.4±160.82        | 315.9±104.67     | 0.350            | 147.89±99.72           | 254.66±60.31     | 0.362            |
| Alcoholic Beverages                       | 57.55±12.76       | 18.03±6.87       | <b>0.007</b>     | 10.34±2.39          | 4.22±1.55        | <b>0.033</b>     | 27.58±5.05             | 9.96±3.06        | <b>0.003</b>     |
| Added Fats & Oils                         | 11.18±3.08        | 18.9±1.66        | <b>0.029</b>     | 8.16±1.2            | 10.02±0.78       | 0.200            | 9.8±1.38               | 13.68±0.83       | <b>0.017</b>     |

|                                           |              |              |                  |              |               |                  |              |              |                  |
|-------------------------------------------|--------------|--------------|------------------|--------------|---------------|------------------|--------------|--------------|------------------|
| Fast Food                                 | 32.84±8.91   | 39.33±4.8    | 0.524            | 12.74±3.24   | 12.54±2.1     | 0.959            | 20.86±3.92   | 23.82±2.37   | 0.521            |
| Miscellaneous                             | 6.78±15.33   | 29.31±8.26   | 0.199            | 9.38±3.06    | 13.86±1.99    | 0.223            | 9.77±6.09    | 20.13±3.68   | 0.148            |
| <b>40-59.9 years</b>                      |              |              |                  |              |               |                  |              |              |                  |
| Bread                                     | 168.08±12.15 | 161.71±8.34  | 0.667            | 88.05±10.48  | 84.5±7.32     | 0.785            | 123.41±7.84  | 118.38±5.47  | 0.600            |
| Cereals and cereal based products         | 76.69±15.82  | 145.83±10.87 | <b>&lt;0.001</b> | 93.73±11.46  | 94.84±8.01    | 0.938            | 86.94±9.42   | 117.23±6.57  | <b>0.009</b>     |
| Legumes                                   | 28.31±10.51  | 53.27±7.22   | 0.051            | 24.26±6.21   | 26.75±4.34    | 0.747            | 25.83±5.71   | 38.62±3.98   | 0.068            |
| Starchy Vegetables                        | 32.44±6.69   | 43.69±4.6    | 0.168            | 28.11±3.8    | 22.57±2.66    | 0.241            | 30.09±3.59   | 31.9±2.5     | 0.682            |
| Vegetables                                | 233.18±23.23 | 237.44±15.96 | 0.880            | 209.68±15.81 | 185.1±11.05   | 0.211            | 218.73±13.36 | 208.89±9.32  | 0.547            |
| Chips & Salty Crackers                    | 0.21±0.6     | 1.45±0.41    | 0.095            | 0.45±0.59    | 1.12±0.41     | 0.366            | 0.37±0.42    | 1.25±0.29    | 0.089            |
| Nuts & Seeds                              | 10.35±4.48   | 15.01±3.08   | 0.393            | 6.32±2.24    | 8.36±1.57     | 0.465            | 7.97±2.31    | 11.36±1.61   | 0.232            |
| Dairy Products                            |              |              |                  |              |               |                  |              |              |                  |
| Milk                                      | 26.34±4.15   | 4.7±2.85     | <b>&lt;0.001</b> | 34.62±4.82   | 16.48±3.37    | <b>0.003</b>     | 30.9±3.22    | 11.32±2.24   | <b>&lt;0.001</b> |
| Milk Derivatives                          | 81.43±9.56   | 78.95±6.57   | 0.831            | 84.08±8.38   | 65.64±5.86    | 0.077            | 81.68±6.23   | 72.18±4.34   | 0.213            |
| Milk Sweetened                            | 1±1.29       | 1.89±0.88    | 0.572            | 2.66±1.85    | 3.63±1.29     | 0.674            | 1.79±1.16    | 2.94±0.81    | 0.423            |
| Meat, Processed Meat, Poultry, Fish, Eggs |              |              |                  |              |               |                  |              |              |                  |
| Red Meat                                  | 91.42±16.67  | 58.06±11.45  | 0.101            | 40.46±4.92   | 33.7±3.43     | 0.268            | 62.26±7.74   | 44.6±5.4     | 0.063            |
| Processed Meat                            | 6.95±1.98    | 5.77±1.36    | 0.626            | 2.17±0.85    | 2.09±0.59     | 0.936            | 4.41±0.98    | 3.64±0.68    | 0.519            |
| Poultry                                   | 17.47±6.62   | 32.31±4.54   | 0.066            | 15.77±3.35   | 14.73±2.34    | 0.803            | 16.41±3.43   | 22.59±2.39   | 0.141            |
| Fish                                      | 22.28±6.12   | 18.71±4.2    | 0.632            | 6.95±3.24    | 9.79±2.27     | 0.482            | 13.45±3.21   | 13.8±2.24    | 0.929            |
| Eggs                                      | 19.21±3.31   | 13.5±2.27    | 0.158            | 10.96±1.6    | 3.75±1.11     | <b>&lt;0.001</b> | 14.66±1.69   | 8.02±1.17    | <b>0.001</b>     |
| Fruits, Total                             |              |              |                  |              |               |                  |              |              |                  |
| Fruits                                    | 240.53±16.41 | 130.39±11.27 | <b>&lt;0.001</b> | 201.02±12.06 | 113.34±8.43   | <b>&lt;0.001</b> | 217.22±9.77  | 121.32±6.82  | <b>&lt;0.001</b> |
| Fresh Juices (100% fruit juices)          | 26.92±7.06   | 10.65±4.85   | 0.059            | 10.34±3.06   | 6.73±2.14     | 0.342            | 17.83±3.51   | 8.3±2.44     | <b>0.027</b>     |
| Sweets & Added Sugars                     |              |              |                  |              |               |                  |              |              |                  |
| Sweets                                    | 23.05±5.09   | 27.85±3.5    | 0.439            | 30.6±4.78    | 26.61±3.34    | 0.502            | 26.68±3.45   | 27.49±2.41   | 0.847            |
| Added Sugars, Jams, Honey, Molasses       | 5.8±1.33     | 9.61±0.91    | <b>0.019</b>     | 4.19±0.73    | 5.85±0.51     | 0.067            | 4.88±0.71    | 7.52±0.49    | <b>0.002</b>     |
| Sugar Sweetened Beverages                 | 119.03±19.09 | 123.93±13.12 | 0.833            | 101.54±258.7 | 282.45±180.86 | 0.573            | 96.18±143.24 | 218.31±99.93 | 0.486            |
| Hot Beverages (Coffee, Tea)               | 166.17±25.73 | 261.19±17.68 | <b>0.003</b>     | 143.58±16.37 | 168.18±11.44  | 0.226            | 156.39±14.5  | 208.01±10.12 | <b>0.004</b>     |
| Alcoholic Beverages                       | 29.46±9.05   | 31.24±6.22   | 0.872            | 6.07±2.21    | 3.18±1.54     | 0.293            | 16.54±4.12   | 15.46±2.87   | 0.831            |
| Added Fats & Oils                         | 12.88±2.67   | 24.03±1.83   | <b>0.001</b>     | 10.93±1.69   | 12.09±1.18    | 0.580            | 11.71±1.49   | 17.43±1.04   | <b>0.002</b>     |
| Fast Food                                 | 13.09±5.4    | 15.6±3.71    | 0.703            | 4.9±2.4      | 5.49±1.68     | 0.841            | 8.52±2.7     | 9.94±1.88    | 0.667            |
| Miscellaneous                             | 15.57±8.1    | 29.58±5.57   | 0.156            | 6.69±5.16    | 18.28±3.61    | 0.071            | 11.92±4.54   | 22.62±3.17   | 0.055            |
| <b>≥60 years</b>                          |              |              |                  |              |               |                  |              |              |                  |
| Bread                                     | 168.35±13.28 | 128.81±9.05  | <b>0.015</b>     | 101.24±15.83 | 84.16±10.39   | 0.371            | 138.05±10.3  | 106.12±6.9   | <b>0.011</b>     |
| Cereals and cereal based products         | 88.82±15.05  | 94.77±10.25  | 0.746            | 87.32±13.89  | 91.49±9.11    | 0.803            | 87.64±10.21  | 93.36±6.84   | 0.644            |
| Legumes                                   | 42.14±11.53  | 44.3±7.86    | 0.878            | 20.86±9.12   | 23.98±5.98    | 0.776            | 31.42±7.38   | 34.57±4.94   | 0.724            |
| Starchy Vegetables                        | 21.33±6.49   | 26.49±4.42   | 0.515            | 17.71±6.76   | 22.77±4.43    | 0.534            | 19.38±4.66   | 24.76±3.12   | 0.341            |



|                                     |              |             |                  |              |              |                  |              |              |                  |
|-------------------------------------|--------------|-------------|------------------|--------------|--------------|------------------|--------------|--------------|------------------|
| Red Meat                            | 82.1±7.38    | 58.01±4.54  | <b>0.006</b>     | 40.48±2.79   | 29.96±1.86   | <b>0.002</b>     | 58.38±3.51   | 42.26±2.27   | <b>&lt;0.001</b> |
| Processed Meat                      | 7.1±1.25     | 5.99±0.77   | 0.453            | 3.73±0.77    | 3.27±0.51    | 0.617            | 5.13±0.69    | 4.49±0.44    | 0.440            |
| Poultry                             | 29.36±4.95   | 38.68±3.05  | 0.111            | 19.35±2.36   | 21.02±1.58   | 0.559            | 23.25±2.5    | 29.07±1.62   | 0.051            |
| Fish                                | 13.52±3.46   | 18.09±2.13  | 0.263            | 7.55±1.68    | 8.44±1.12    | 0.660            | 10.02±1.75   | 12.78±1.13   | 0.188            |
| Eggs                                | 16.15±1.85   | 10.75±1.14  | <b>0.013</b>     | 9.65±0.89    | 4.76±0.59    | <b>&lt;0.001</b> | 12.69±0.93   | 7.3±0.6      | <b>&lt;0.001</b> |
| Fruits, Total                       |              |             |                  |              |              |                  |              |              |                  |
| Fruits                              | 226±11.31    | 115.96±6.96 | <b>&lt;0.001</b> | 198.59±7.95  | 108.29±5.31  | <b>&lt;0.001</b> | 210.22±6.6   | 111.59±4.27  | <b>&lt;0.001</b> |
| Fresh Juices (100% fruit juices)    | 19.73±3.74   | 9.48±2.3    | <b>0.020</b>     | 21.29±3.09   | 7.7±2.07     | <b>&lt;0.001</b> | 20.6±2.37    | 8.53±1.53    | <b>&lt;0.001</b> |
| Sweets & Added Sugars               |              |             |                  |              |              |                  |              |              |                  |
| Sweets                              | 32.3±3.48    | 33.54±2.14  | 0.762            | 37.42±2.87   | 32.16±1.92   | 0.131            | 35.43±2.2    | 32.74±1.43   | 0.307            |
| Added Sugars, Jams, Honey, Molasses | 7.3±0.8      | 8.56±0.49   | 0.180            | 5.83±0.53    | 5.99±0.35    | 0.800            | 6.6±0.45     | 7.08±0.29    | 0.381            |
| Sugar Sweetened Beverages           | 194.51±14.6  | 171.44±8.99 | 0.180            | 134.17±85.98 | 156.85±57.45 | 0.828            | 153.37±49.55 | 165.76±32.05 | 0.834            |
| Hot Beverages (Coffee, Tea)         | 171.87±13.62 | 198.7±8.39  | 0.095            | 135.14±83.53 | 237.51±55.81 | 0.312            | 155.58±48.09 | 217.75±31.1  | 0.279            |
| Alcoholic Beverages                 | 40.26±6.67   | 23.84±4.11  | 0.037            | 7.57±1.51    | 4.02±1.01    | 0.052            | 21.59±2.95   | 12.7±1.91    | <b>0.012</b>     |
| Added Fats & Oils                   | 12.43±1.83   | 21.12±1.13  | <b>&lt;0.001</b> | 9.37±0.88    | 10.39±0.59   | 0.338            | 10.93±0.93   | 15.1±0.6     | <b>&lt;0.001</b> |
| Fast Food                           | 19.52±4.29   | 24.55±2.64  | 0.320            | 8.91±1.88    | 8.48±1.25    | 0.852            | 13.21±2.11   | 15.75±1.37   | 0.315            |
| Miscellaneous                       | 9.28±7.28    | 27.42±4.48  | <b>0.035</b>     | 8.68±2.73    | 15.69±1.82   | <b>0.034</b>     | 9.77±3.46    | 20.62±2.23   | <b>0.009</b>     |

Values in this table represent means ± SE.

Numbers in **bold** face are statistically significant (p-value ≤0.05).

**Supplementary Table S2.** Mean macronutrient intake (g/day) (by sex and age) and their comparison between year 1997 and 2009, in the study population (n=3581), aged ≥20 years, Lebanon

|                      | Males<br>(n=1572) |                  |                  | Females<br>(n=2009) |                  |                  | Both sexes<br>(n=3581) |                  |                  |
|----------------------|-------------------|------------------|------------------|---------------------|------------------|------------------|------------------------|------------------|------------------|
|                      | 1997<br>(n=436)   | 2009<br>(n=1136) | p-<br>value      | 1997<br>(n=627)     | 2009<br>(n=1382) | p-<br>value      | 1997<br>(n=1063)       | 2009<br>(n=2518) | p-<br>value      |
| <b>20-39.9 years</b> |                   |                  |                  |                     |                  |                  |                        |                  |                  |
| Carbohydrate         | 289.48±9.53       | 283.56±5.13      | 0.587            | 194.23±5.21         | 199.08±3.38      | 0.438            | 234.5±4.87             | 233.38±2.94      | 0.846            |
| Protein              | 92.68±5.82        | 86.06±3.13       | 0.320            | 54.93±1.79          | 58.15±1.16       | 0.135            | 70.21±2.47             | 69.56±1.49       | 0.825            |
| Fat                  | 85.3±3.77         | 95.88±2.03       | <b>0.014</b>     | 61.64±2.23          | 71.94±1.45       | <b>&lt;0.001</b> | 71.87±1.99             | 81.66±1.2        | <b>&lt;0.001</b> |
| Saturated fat        | 24.06±1.18        | 28.14±0.63       | <b>0.003</b>     | 17.92±0.76          | 21.65±0.49       | <b>&lt;0.001</b> | 20.62±0.65             | 24.28±0.39       | <b>&lt;0.001</b> |
| Oleic Acid           | 24.44±1.67        | 30.09±0.9        | <b>0.003</b>     | 18.56±0.93          | 22.02±0.6        | <b>0.002</b>     | 21.23±0.85             | 25.32±0.51       | <b>&lt;0.001</b> |
| Linolenic Acid       | 0.28±0.02         | 0.38±0.01        | <b>&lt;0.001</b> | 0.21±0.01           | 0.28±0           | <b>&lt;0.001</b> | 0.24±0.01              | 0.32±0           | <b>&lt;0.001</b> |
| Linoleic Acid        | 8.76±0.78         | 12.81±0.42       | <b>&lt;0.001</b> | 6.35±0.52           | 9.78±0.33        | <b>&lt;0.001</b> | 7.41±0.43              | 11.02±0.26       | <b>&lt;0.001</b> |
| Total Sugar          | 65.05±3.99        | 62.57±2.15       | 0.588            | 46.5±2.13           | 44.95±1.38       | 0.543            | 54.54±2.01             | 52.07±1.21       | 0.295            |
| Dietary fibers       | 19.53±1.17        | 18.07±0.63       | 0.278            | 14.03±0.56          | 14.36±0.36       | 0.624            | 16.37±0.56             | 15.83±0.34       | 0.421            |
| <b>40-59.9 years</b> |                   |                  |                  |                     |                  |                  |                        |                  |                  |
| Carbohydrate         | 247.43±8.3        | 264.35±5.7       | 0.095            | 171.97±6.01         | 198.43±4.2       | <b>&lt;0.001</b> | 204.22±4.91            | 227.85±3.42      | <b>&lt;0.001</b> |
| Protein              | 81.5±3.65         | 84.87±2.5        | 0.449            | 52.85±3.56          | 60.02±2.49       | 0.106            | 65.34±2.53             | 70.99±1.76       | 0.068            |
| Fat                  | 76.99±3.73        | 96.25±2.56       | <b>&lt;0.001</b> | 58.26±2.55          | 67.89±1.78       | <b>0.002</b>     | 65.84±2.15             | 80.73±1.5        | <b>&lt;0.001</b> |
| Saturated fat        | 22.45±1.54        | 26.33±1.06       | <b>0.040</b>     | 16.7±0.82           | 19.01±0.57       | <b>0.024</b>     | 19.06±0.81             | 22.32±0.56       | <b>0.001</b>     |
| Oleic Acid           | 24.63±1.85        | 33.44±1.27       | <b>&lt;0.001</b> | 18.38±1.14          | 23.08±0.79       | <b>0.001</b>     | 20.86±1.02             | 27.79±0.71       | <b>&lt;0.001</b> |
| Linolenic Acid       | 0.28±0.02         | 0.38±0.01        | <b>&lt;0.001</b> | 0.24±0.02           | 0.28±0.01        | 0.139            | 0.25±0.01              | 0.33±0.01        | <b>&lt;0.001</b> |
| Linoleic Acid        | 8.21±0.75         | 12.99±0.52       | <b>&lt;0.001</b> | 6.18±0.61           | 9.37±0.43        | <b>&lt;0.001</b> | 6.97±0.47              | 11.03±0.33       | <b>&lt;0.001</b> |
| Total Sugar          | 59.15±5.38        | 51.91±3.69       | 0.270            | 36.4±2.22           | 42.73±1.55       | <b>0.022</b>     | 46.01±2.64             | 46.91±1.84       | 0.782            |
| Dietary fibers       | 18.43±0.96        | 20.14±0.66       | 0.147            | 14.46±0.81          | 15.74±0.56       | 0.207            | 16.14±0.61             | 17.71±0.42       | <b>0.037</b>     |
| <b>≥60 years</b>     |                   |                  |                  |                     |                  |                  |                        |                  |                  |
| Carbohydrate         | 224.76±9.43       | 216.92±6.42      | 0.496            | 170.19±8.33         | 176.31±5.46      | 0.542            | 198.22±6.29            | 197.21±4.21      | 0.895            |
| Protein              | 65.83±2.75        | 65.04±1.87       | 0.814            | 47.95±3.4           | 53.03±2.23       | 0.215            | 57.41±2.16             | 59.1±1.45        | 0.520            |
| Fat                  | 66.79±4.29        | 78.06±2.92       | <b>0.032</b>     | 50.31±3.79          | 58.42±2.49       | 0.077            | 58.93±2.88             | 68.4±1.93        | <b>0.007</b>     |
| Saturated fat        | 18.45±1.34        | 21.34±0.91       | 0.079            | 14.31±1.12          | 17±0.73          | <b>0.047</b>     | 16.49±0.87             | 19.2±0.58        | <b>0.011</b>     |
| Oleic Acid           | 21.39±1.95        | 28.17±1.33       | <b>0.005</b>     | 16.2±1.88           | 20.68±1.23       | <b>0.050</b>     | 18.93±1.36             | 24.47±0.91       | <b>0.001</b>     |
| Linolenic Acid       | 0.24±0.02         | 0.33±0.01        | <b>0.002</b>     | 0.2±0.02            | 0.27±0.01        | <b>0.031</b>     | 0.22±0.01              | 0.3±0.01         | <b>&lt;0.001</b> |
| Linoleic Acid        | 6.87±1.36         | 10.66±0.92       | <b>0.023</b>     | 5.62±0.68           | 6.67±0.45        | 0.203            | 6.27±0.78              | 8.7±0.52         | <b>0.010</b>     |
| Total Sugar          | 40.66±4.06        | 44.95±2.77       | 0.388            | 40.83±3.38          | 37.55±2.22       | 0.422            | 40.36±2.66             | 41.48±1.78       | 0.728            |
| Dietary fibers       | 18.21±1.18        | 17.56±0.8        | 0.651            | 14.59±1.1           | 16.43±0.72       | 0.164            | 16.5±0.8               | 17±0.54          | 0.608            |

| <b>Total population (≥20 years)</b> |             |             |                  |             |             |                  |             |            |                  |
|-------------------------------------|-------------|-------------|------------------|-------------|-------------|------------------|-------------|------------|------------------|
| Carbohydrate                        | 261.32±5.43 | 264.06±3.35 | 0.669            | 183.58±3.57 | 195.18±2.38 | <b>0.007</b>     | 217.62±3.09 | 225.35±2   | <b>0.036</b>     |
| Protein                             | 83.18±2.87  | 81.37±1.77  | 0.593            | 53.4±1.59   | 57.88±1.06  | <b>0.020</b>     | 66.23±1.52  | 68.22±0.98 | 0.274            |
| Fat                                 | 78.7±2.29   | 92.32±1.41  | <b>&lt;0.001</b> | 59.01±1.54  | 68.55±1.03  | <b>&lt;0.001</b> | 67.73±1.31  | 79±0.85    | <b>&lt;0.001</b> |
| Saturated fat                       | 22.48±0.8   | 26.18±0.49  | <b>&lt;0.001</b> | 17.03±0.51  | 20.11±0.34  | <b>&lt;0.001</b> | 19.43±0.45  | 22.78±0.29 | <b>&lt;0.001</b> |
| Oleic Acid                          | 23.89±1.06  | 30.72±0.65  | <b>&lt;0.001</b> | 18.22±0.67  | 22.13±0.45  | <b>&lt;0.001</b> | 20.76±0.59  | 25.91±0.38 | <b>&lt;0.001</b> |
| Linolenic Acid                      | 0.28±0.01   | 0.37±0.01   | <b>&lt;0.001</b> | 0.22±0.01   | 0.28±0.01   | <b>&lt;0.001</b> | 0.25±0.01   | 0.32±0.01  | <b>&lt;0.001</b> |
| Linoleic Acid                       | 8.26±0.52   | 12.41±0.32  | <b>&lt;0.001</b> | 6.22±0.35   | 9.18±0.24   | <b>&lt;0.001</b> | 7.12±0.3    | 10.61±0.19 | <b>&lt;0.001</b> |
| Total Sugar                         | 57.91±2.7   | 55.71±1.66  | 0.491            | 42.42±1.42  | 43.03±0.95  | 0.724            | 49.09±1.4   | 48.62±0.91 | 0.778            |
| Dietary fibers                      | 18.81±0.66  | 18.61±0.41  | 0.794            | 14.24±0.43  | 15.12±0.29  | 0.089            | 16.26±0.37  | 16.64±0.24 | 0.401            |

Values in this table represent means ± SE.

Numbers in **bold** face are statistically significant (p-value ≤0.05).

**Supplementary Table S3.** Mean micronutrient intake (g/day) (by sex and age) and their comparison between year 1997 and 2009, in the study population (n=3581), aged  $\geq 20$  years, Lebanon

|                                                      | Males<br>(n=1572)    |                     |              | Females<br>(n=2009) |                     |                  | Both sexes<br>(n=3581) |                    |                  |
|------------------------------------------------------|----------------------|---------------------|--------------|---------------------|---------------------|------------------|------------------------|--------------------|------------------|
|                                                      | 1997<br>(n=436)      | 2009<br>(n=1136)    | p-<br>value  | 1997<br>(n=627)     | 2009<br>(n=1382)    | p-<br>value      | 1997<br>(n=1063)       | 2009<br>(n=2518)   | p-<br>value      |
| <b>20-39.9 years</b>                                 |                      |                     |              |                     |                     |                  |                        |                    |                  |
| Calcium (mg)                                         | 729.52 $\pm$ 46.96   | 709.38 $\pm$ 25.29  | 0.707        | 484.83 $\pm$ 18     | 521.87 $\pm$ 11.68  | 0.086            | 586.82 $\pm$ 21.08     | 597.72 $\pm$ 12.72 | 0.660            |
| Iron (mg)                                            | 11.32 $\pm$ 0.53     | 12.23 $\pm$ 0.28    | 0.135        | 7.98 $\pm$ 0.3      | 9.12 $\pm$ 0.19     | <b>0.002</b>     | 9.37 $\pm$ 0.27        | 10.4 $\pm$ 0.16    | <b>0.002</b>     |
| Zinc (mg)                                            | 10.6 $\pm$ 0.58      | 10.31 $\pm$ 0.31    | 0.671        | 6.32 $\pm$ 0.25     | 7.34 $\pm$ 0.16     | <b>0.001</b>     | 8.06 $\pm$ 0.27        | 8.55 $\pm$ 0.16    | 0.126            |
| Vitamin A (RAE, $\mu$ g)                             | 815.66 $\pm$ 183.17  | 905.55 $\pm$ 98.67  | 0.668        | 742.62 $\pm$ 97.07  | 787.58 $\pm$ 62.98  | 0.699            | 777.94 $\pm$ 91.69     | 835.5 $\pm$ 55.35  | 0.593            |
| Vitamin C (mg)                                       | 85.74 $\pm$ 6.1      | 93.83 $\pm$ 3.29    | 0.247        | 90.19 $\pm$ 4.97    | 75.62 $\pm$ 3.22    | <b>0.015</b>     | 89.85 $\pm$ 3.85       | 83.13 $\pm$ 2.32   | 0.138            |
| Vitamin B12 ( $\mu$ g)                               | 4.41 $\pm$ 1.47      | 6.09 $\pm$ 0.79     | 0.322        | 2.78 $\pm$ 0.67     | 3.93 $\pm$ 0.43     | 0.157            | 3.49 $\pm$ 0.69        | 4.82 $\pm$ 0.42    | 0.106            |
| <b>40-59.9 years</b>                                 |                      |                     |              |                     |                     |                  |                        |                    |                  |
| Calcium (mg)                                         | 624.7 $\pm$ 32.64    | 636.43 $\pm$ 22.43  | 0.768        | 513.11 $\pm$ 30.85  | 532.52 $\pm$ 21.57  | 0.612            | 557.68 $\pm$ 22.19     | 580.41 $\pm$ 15.48 | 0.403            |
| Iron (mg)                                            | 11.1 $\pm$ 0.59      | 12.08 $\pm$ 0.4     | 0.177        | 7.54 $\pm$ 0.38     | 9.24 $\pm$ 0.26     | <b>&lt;0.001</b> | 9.06 $\pm$ 0.33        | 10.51 $\pm$ 0.23   | <b>&lt;0.001</b> |
| Zinc (mg)                                            | 9.76 $\pm$ 0.58      | 10.26 $\pm$ 0.4     | 0.484        | 6.31 $\pm$ 0.33     | 7.2 $\pm$ 0.23      | <b>0.030</b>     | 7.76 $\pm$ 0.31        | 8.58 $\pm$ 0.21    | <b>0.033</b>     |
| Vitamin A (RAE, $\mu$ g)                             | 1353.36 $\pm$ 303.61 | 869.29 $\pm$ 208.62 | 0.191        | 770.98 $\pm$ 156.31 | 788.22 $\pm$ 109.28 | 0.929            | 1008.38 $\pm$ 157.96   | 830.85 $\pm$ 110.2 | 0.358            |
| Vitamin C (mg)                                       | 93.36 $\pm$ 6.35     | 89.04 $\pm$ 4.36    | 0.576        | 77.51 $\pm$ 4.51    | 71.48 $\pm$ 3.15    | 0.283            | 84.08 $\pm$ 3.72       | 79.41 $\pm$ 2.59   | 0.306            |
| Vitamin B12 ( $\mu$ g)                               | 5.21 $\pm$ 1.3       | 5.54 $\pm$ 0.89     | 0.831        | 2.8 $\pm$ 0.87      | 4.07 $\pm$ 0.61     | 0.243            | 3.74 $\pm$ 0.74        | 4.77 $\pm$ 0.52    | 0.262            |
| <b><math>\geq 60</math> years</b>                    |                      |                     |              |                     |                     |                  |                        |                    |                  |
| Calcium (mg)                                         | 590.26 $\pm$ 30.81   | 566.58 $\pm$ 20.99  | 0.529        | 485.89 $\pm$ 30.38  | 509.85 $\pm$ 19.93  | 0.513            | 540.88 $\pm$ 21.56     | 538.58 $\pm$ 14.45 | 0.930            |
| Iron (mg)                                            | 9.43 $\pm$ 0.55      | 9.86 $\pm$ 0.38     | 0.531        | 7.24 $\pm$ 0.72     | 8.49 $\pm$ 0.47     | 0.154            | 8.35 $\pm$ 0.45        | 9.2 $\pm$ 0.3      | 0.117            |
| Zinc (mg)                                            | 7.71 $\pm$ 0.45      | 8.1 $\pm$ 0.3       | 0.476        | 5.35 $\pm$ 0.38     | 6.65 $\pm$ 0.25     | <b>0.006</b>     | 6.6 $\pm$ 0.29         | 7.38 $\pm$ 0.19    | <b>0.032</b>     |
| Vitamin A (RAE, $\mu$ g)                             | 1149.07 $\pm$ 197.2  | 681.91 $\pm$ 134.33 | 0.053        | 690.26 $\pm$ 110.61 | 593.81 $\pm$ 72.57  | 0.469            | 932.92 $\pm$ 114.75    | 637.89 $\pm$ 76.9  | <b>0.034</b>     |
| Vitamin C (mg)                                       | 75.73 $\pm$ 9.2      | 79.62 $\pm$ 6.26    | 0.729        | 69.4 $\pm$ 6.07     | 73.9 $\pm$ 3.98     | 0.539            | 72 $\pm$ 5.57          | 77.13 $\pm$ 3.73   | 0.447            |
| Vitamin B12 ( $\mu$ g)                               | 7.39 $\pm$ 1.61      | 4.48 $\pm$ 1.09     | 0.140        | 3.95 $\pm$ 0.94     | 2.63 $\pm$ 0.62     | 0.245            | 5.79 $\pm$ 0.94        | 3.55 $\pm$ 0.63    | 0.051            |
| <b>Total population (<math>\geq 20</math> years)</b> |                      |                     |              |                     |                     |                  |                        |                    |                  |
| Calcium (mg)                                         | 664.77 $\pm$ 24.1    | 657.39 $\pm$ 14.84  | 0.795        | 494.37 $\pm$ 14.54  | 523.62 $\pm$ 9.7    | 0.097            | 567.28 $\pm$ 13.2      | 582.73 $\pm$ 8.53  | 0.327            |
| Iron (mg)                                            | 10.88 $\pm$ 0.33     | 11.71 $\pm$ 0.2     | <b>0.033</b> | 7.76 $\pm$ 0.23     | 9.05 $\pm$ 0.15     | <b>&lt;0.001</b> | 9.1 $\pm$ 0.19         | 10.23 $\pm$ 0.12   | <b>&lt;0.001</b> |
| Zinc (mg)                                            | 9.71 $\pm$ 0.34      | 9.84 $\pm$ 0.21     | 0.748        | 6.21 $\pm$ 0.18     | 7.19 $\pm$ 0.12     | <b>&lt;0.001</b> | 7.72 $\pm$ 0.18        | 8.36 $\pm$ 0.11    | <b>0.003</b>     |
| Vitamin A (RAE, $\mu$ g)                             | 1082.05 $\pm$ 139.03 | 857.75 $\pm$ 85.62  | 0.172        | 747.39 $\pm$ 73.9   | 757.46 $\pm$ 49.3   | 0.910            | 892.32 $\pm$ 72.47     | 799.57 $\pm$ 46.83 | 0.284            |
| Vitamin C (mg)                                       | 86.86 $\pm$ 3.97     | 89.48 $\pm$ 2.45    | 0.576        | 82.69 $\pm$ 3.11    | 74.1 $\pm$ 2.07     | <b>0.023</b>     | 84.61 $\pm$ 2.45       | 80.94 $\pm$ 1.58   | 0.209            |
| Vitamin B12 ( $\mu$ g)                               | 5.32 $\pm$ 0.86      | 5.66 $\pm$ 0.53     | 0.737        | 2.97 $\pm$ 0.48     | 3.78 $\pm$ 0.32     | 0.158            | 4.00 $\pm$ 0.45        | 4.60 $\pm$ 0.29    | 0.271            |

Values in this table represent means  $\pm$  SE.

Numbers in **bold** face are statistically significant (p-value  $\leq 0.05$ ).
